# Supplementary material for: Cylindrospermopsin Biodegradation Abilities of Aeromonas sp. Isolated from Rusałka Lake
Source: MDPI journal article supplement (doi:10.3390/toxins8030055), 2016-02-25
Supplement: s1 [file s1]

# Supplementary Materials: Cyindrospermopsin Biodegradation Abilities of *Aeromonas* sp. Isolated from Rusalka Lake

Dariusz Dziga, Mikolaj Kokocinski, Anna Maksylewicz, Urszula Czaja-Prokop and Jakub Barylski

**Table S1.** Geographical position and limnological characteristics of the investigated lakes.

| Geographical and Limnological Parameters | Lake Rusalka | Lake Kierskie Małe |
|------------------------------------------|--------------|--------------------|
| Latitude                                 | 52°25'35"    | 52°29'12"          |
| Longitude                                | 16°52'40"    | 16°47'14"          |
| Area (ha)                                | 36.7         | 26.0               |
| Average depth (m)                        | 1.9          | 1.4                |
| Max. Depth (m)                           | 9.0          | 2.3                |
| Secchi depth (m)                         | 0.5          | 0.5                |
| Chl-a ( $\mu\text{g L}^{-1}$ )           | 60.1         | 108.2              |
| CYN ( $\mu\text{g L}^{-1}$ )             | na           | 0.15               |

na: indicates not analysed.

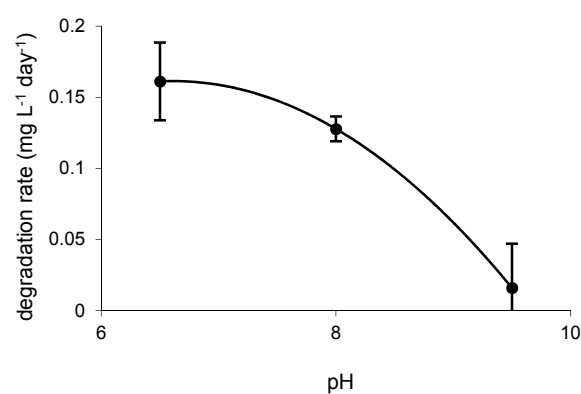

(a)

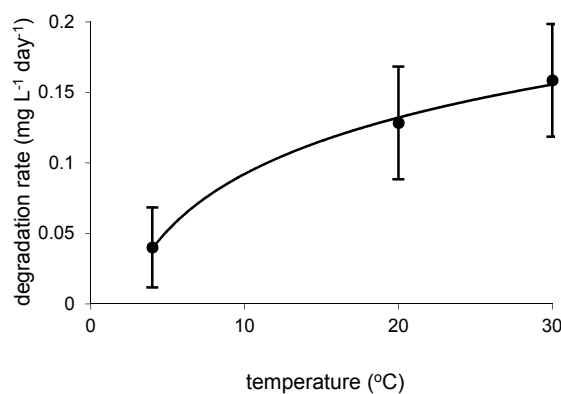

(b)

**Figure S1.** CYN biodegradation rates at different pH (a) and temperature (b). Errors indicate standard deviation ( $n = 3$ ).
